# Supplementary material
Source: HighWire-hosted journal article supplement (http://molpharm.aspetjournals.org/highwire/filestream/83851/field_highwire_adjunct_files/0/116178_Binmahfouz_Supp_figs.pdf)
Supplement: 116178_Binmahfouz_Supp_figs.pdf [file 116178_Binmahfouz_Supp_figs.pdf]

## SUPPLEMENTAL DATA

### Identification of Serine-875 as an Inhibitory Phosphorylation Site in the Calcium-Sensing Receptor

Lenah S Binmahfouz, Patricia P Centeno, Arthur D Conigrave and Donald T Ward

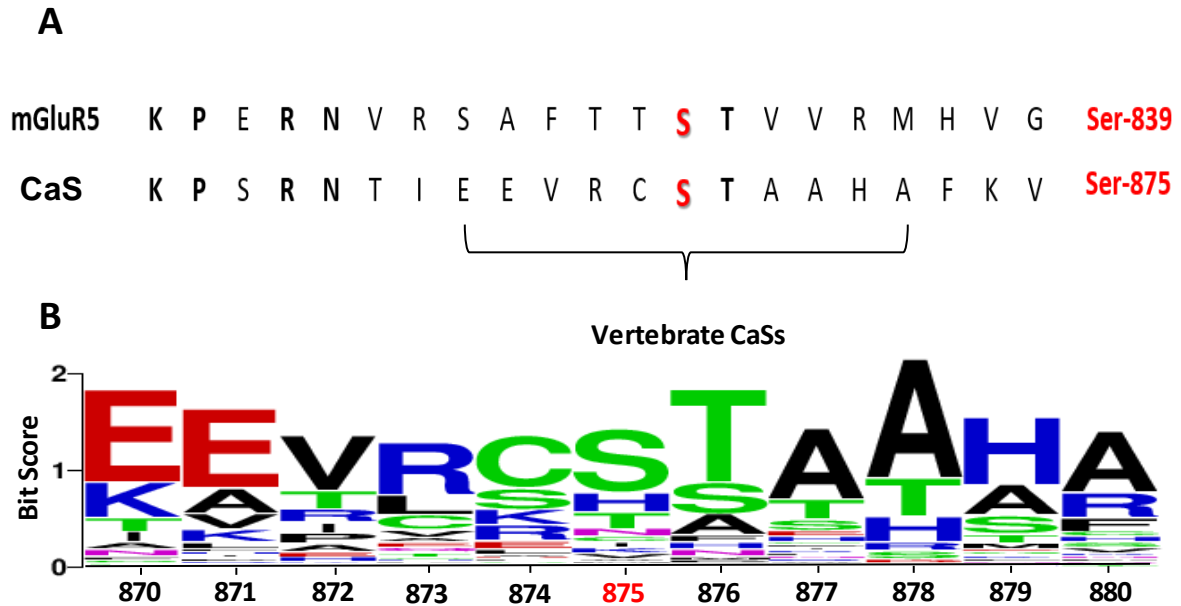

**Supplementary Figure 1: Sequence alignment of the CaS and mGluR5 intracellular domains. A)** Sequence alignment of the juxtamembrane regions of the CaS and mGluR5 intracellular domains indicates that the putative PKC phosphorylation site Ser-839 in mGluR5 aligns with Ser-875 in CaS (serine residues shown in red). **B)** Weblogo multiple sequence alignment of Ser-875 phosphorylation site. The multiple sequence alignment of the vertebrate CaSs obtained from (Herberger and Loretz, 2013) is showing amino acid residues surrounding Ser-875 phosphorylation site at positions -5 to +5. The calculated bit scores indicate an overall high score for the respective amino acids reflecting their conservation and stabilisation among different species.

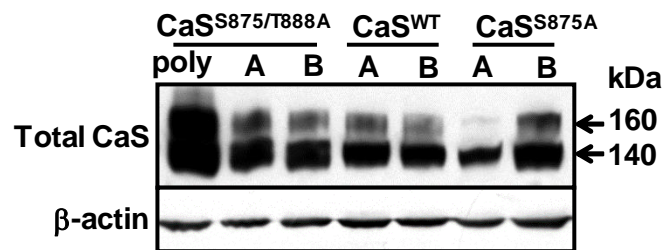

**Supplementary Figure 2: Western blot analysis of CaS in HEK-293 cells stably transfected with either wild-type or mutant CaS cDNAs.** Wild-type HEK-293 cells were transfected with linearised vectors encoding CaS<sup>WT</sup>, CaS<sup>S875A</sup> and CaS<sup>S875A/T888A</sup> then selected with 400 µg/ml hygromycin for two weeks. Single clones from the stable polyclonal pool were then expanded for an additional three weeks under hygromycin maintenance dose (200 µg/ml). Representative western blots show robust CaS expression in lysed cells from either the initial stable polyclone (poly) or from two individual monoclonal cell lines (A & B). Clonal cell lines that expressed mutant receptors at levels close to the CaS<sup>WT</sup>-expressing cells were selected for subsequent studies (clone A, CaS<sup>WT</sup>; clone B, CaS<sup>S875A</sup>; clone A, CaS<sup>S875A/T888A</sup>). The CaS immunoreactivity (ADD monoclonal anti-CaS antibody) included the distinctive immature 140-kDa and mature 160-kDa CaS proteins. β-actin was included as a loading control.

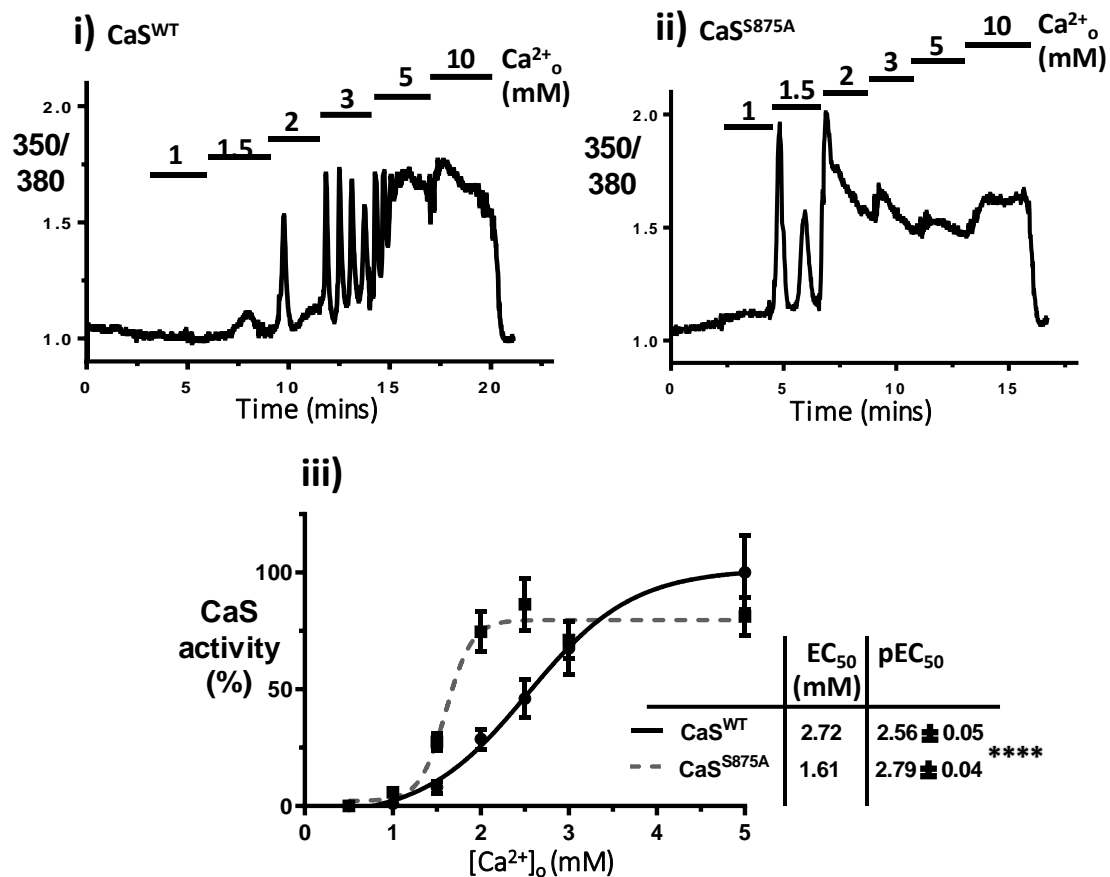

**Supplementary Figure 3: Effect of CaS<sup>S875A</sup> mutation on Ca<sup>2+</sup><sub>i</sub> mobilisation following stable transfection into HEK-293 cells.** Fura-2-loaded HEK-293 cells stably expressing either CaS<sup>WT</sup> (i) or CaS<sup>S875A</sup> (ii) were stimulated with increasing Ca<sup>2+</sup><sub>o</sub> concentrations (0.5–10 mM) and Ca<sup>2+</sup><sub>i</sub> assayed. Representative Ca<sup>2+</sup><sub>i</sub> traces are shown (i and ii) with the resulting concentration-effect curves shown in panel iii. \*\*\*P<0.001 for pEC<sub>50</sub>s of CaS<sup>S875A</sup> vs CaS<sup>WT</sup> by unpaired t-test; n ≥ 12 coverslips from three independent experiments.

A

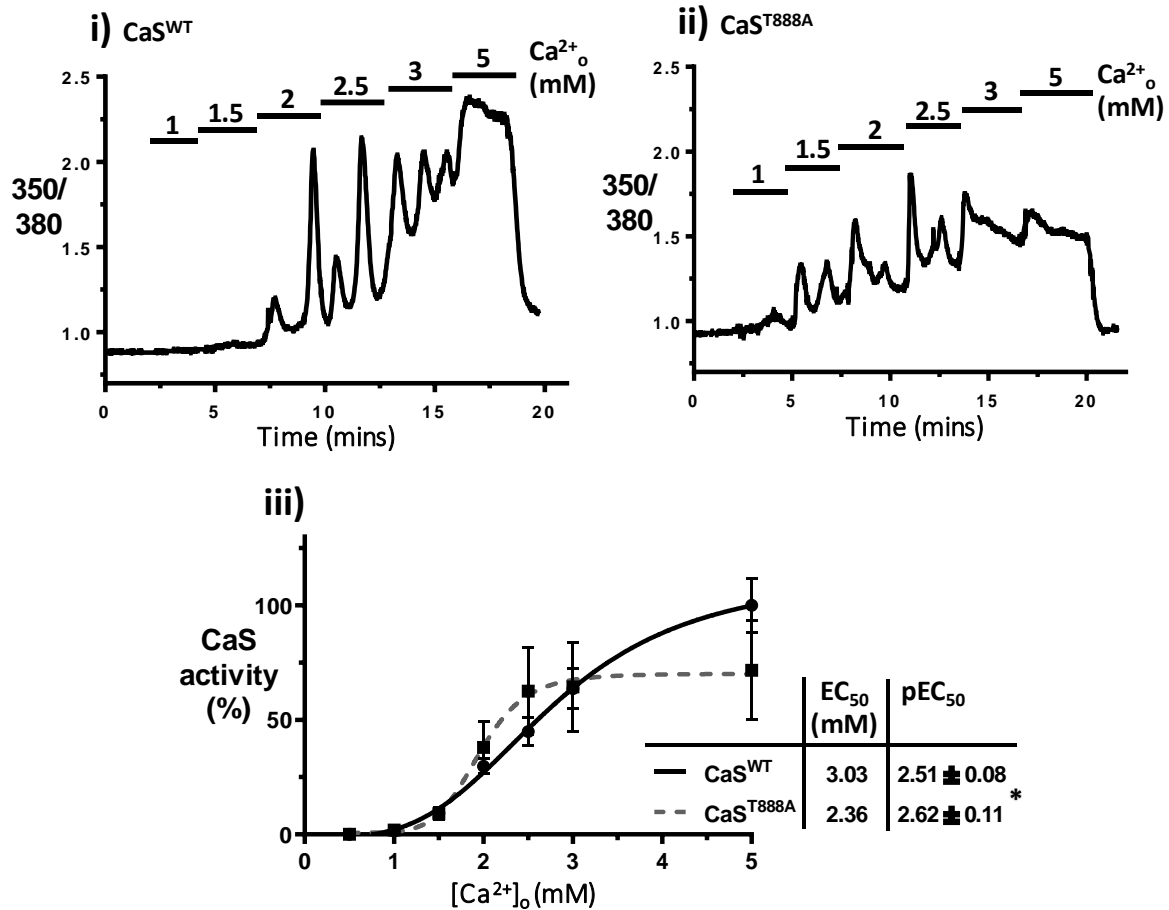

**Supplementary Figure 4: CaS<sup>T888A</sup> exhibits enhanced Ca<sup>2+</sup><sub>i</sub> mobilisation.** Fura-2-loaded HEK-293 cells stably expressing either CaS<sup>WT</sup> (i) or CaS<sup>T888A</sup> (ii) were stimulated with increasing Ca<sup>2+</sup><sub>o</sub> concentrations (0.5–5 mM) and Ca<sup>2+</sup><sub>i</sub> assayed. Representative Ca<sup>2+</sup><sub>i</sub> traces are shown (i and ii) with the resulting concentration-effect curves shown in panel iii. \*P<0.05 for pEC<sub>50</sub>s of CaS<sup>T888A</sup> vs CaS<sup>WT</sup> by unpaired t-test; n ≥ 6 coverslips from three independent experiments.

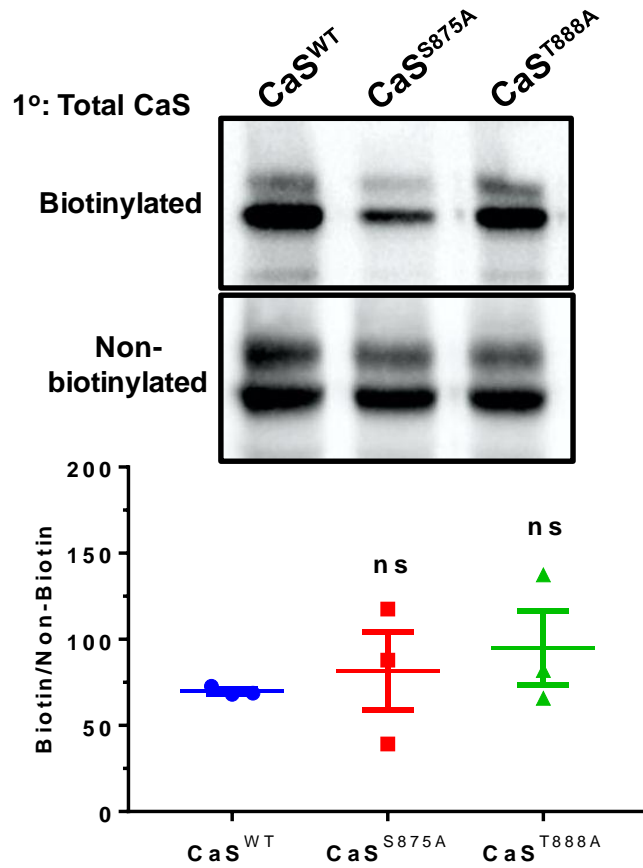

**Supplementary Figure 5: Relative membrane localisation of receptor mutants CaS<sup>S875A</sup> and CaS<sup>T888A</sup> following transient transfection in HEK-293 cells.** HEK-293 cells were transiently transfected with either CaS<sup>S875A</sup> or CaS<sup>T888A</sup> and then transferred to 35 mm dishes. Cell surface CaR expression was determined using the Pierce Cell Surface Protein Isolation Kit (Fisher Scientific) according to the manufacturer's instructions. Sulfo-NHS-SS-Biotin-labelled cell surface proteins were collected using NeutrAvidin Agarose beads. There were no gross or statistically significant differences in membrane localization between the 3 receptors ( $P=0.55$  RM-ANOVA). Data are shown graphically as mean  $\pm$  SEM and include individual data points.

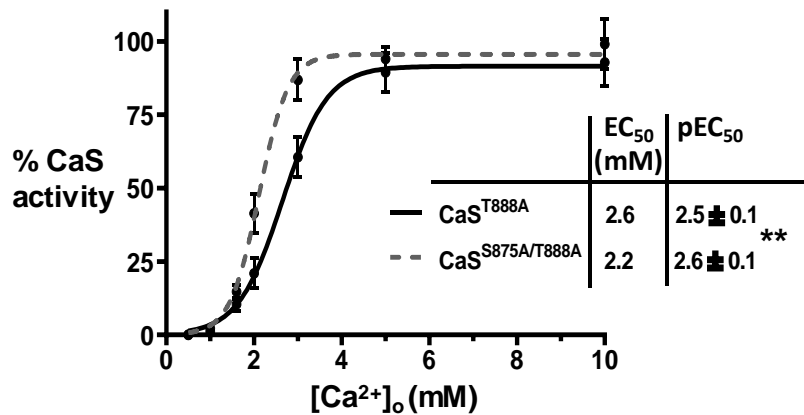

**Supplementary Figure 6: Effect of CaS<sup>S875A/T888A</sup> double mutation on Ca<sup>2+</sup><sub>i</sub> mobilisation following transient transfection into HEK-293 cells.** Fura-2-loaded HEK-293 cells were transiently transfected with either CaS<sup>T888A</sup> or CaS<sup>S875A/T888A</sup>, then stimulated with increasing Ca<sup>2+</sup><sub>o</sub> concentrations (0.5–10 mM) and their Ca<sup>2+</sup><sub>i</sub> content assayed. The concentration-effect curves show the significantly enhanced Ca<sup>2+</sup><sub>o</sub> sensitivity in the CaS<sup>S875A/T888A</sup> double mutant cells. \*\*P<0.01 pEC<sub>50</sub> CaS<sup>T888A</sup> vs CaS<sup>S875A/T888A</sup> by unpaired t-test; n ≥ 12 coverslips from three independent experiments.

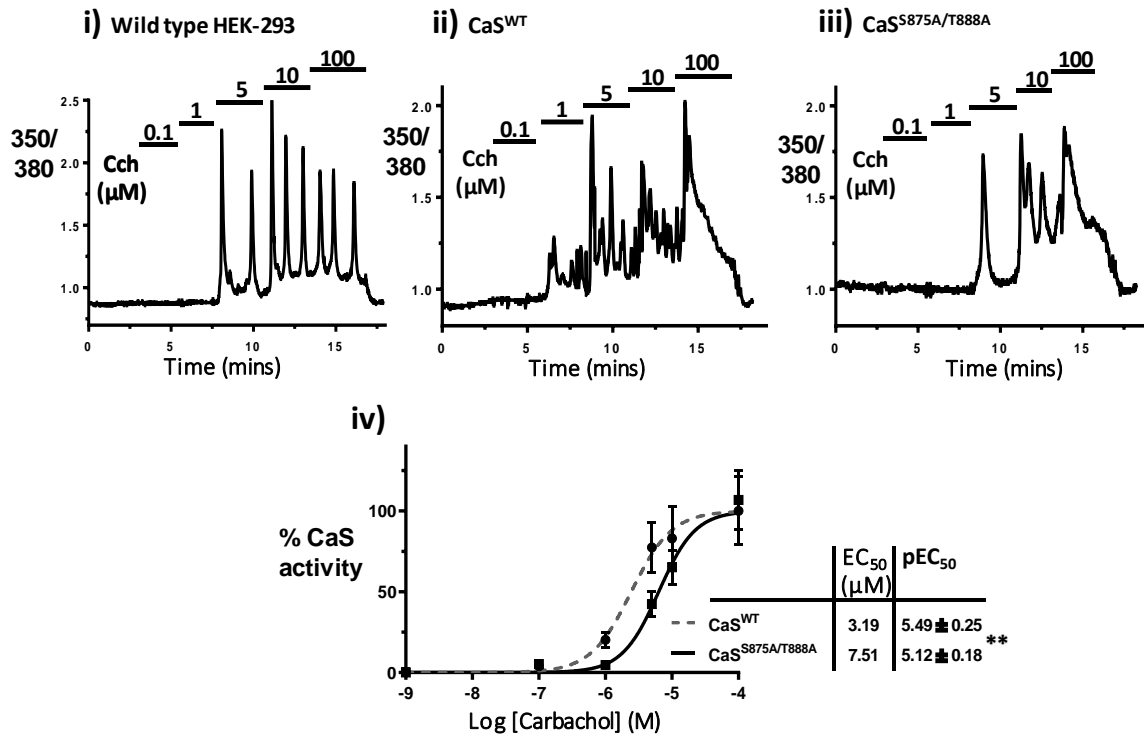

**Supplemental Figure 7: CaS<sup>S875A/T888A</sup> double mutation does not enhance muscarinic receptor responsiveness.** Fura-2-loaded HEK-293 cells stably transfected with either CaS<sup>WT</sup> (ii) or CaS<sup>S875A/T888A</sup> (iii) were stimulated with increasing concentrations of carbachol (0.1-100 μM; Cch) and their Ca<sup>2+</sup><sub>i</sub> content assayed. The response to carbachol in wild-type HEK-293 cells is shown in panel i. The Ca<sup>2+</sup><sub>o</sub> sensitivity of CaS<sup>S875A/T888A</sup> was not increased but was, in fact, decreased. \*\*P<0.01 pEC<sub>50</sub> vs CaS<sup>WT</sup> by unpaired t-test. Results are representative of a minimum of nine coverslips from three independent experiments.

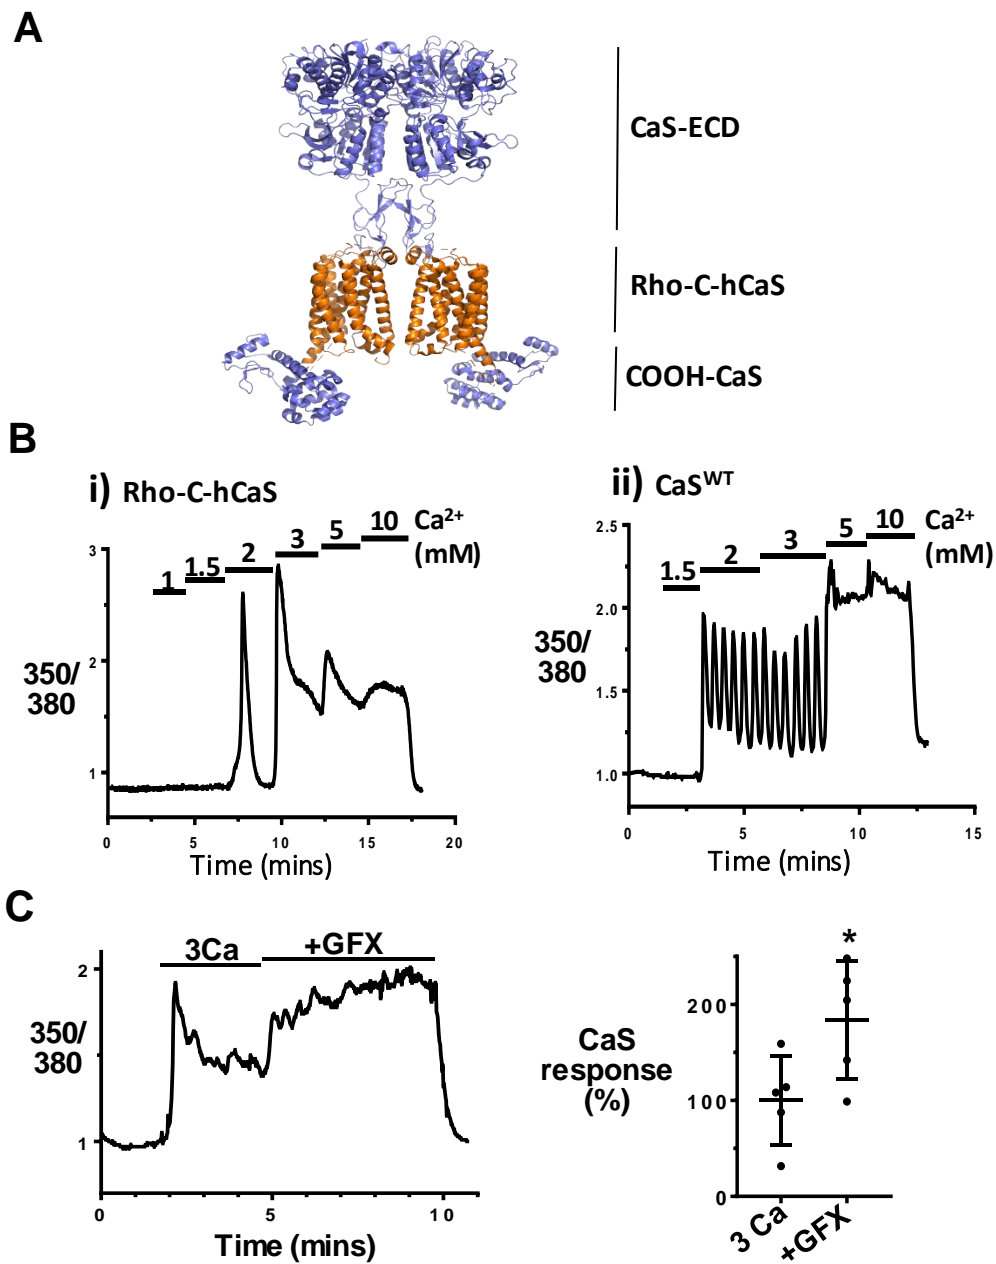

**Supplemental Figure 8: Ca<sup>2+</sup><sub>i</sub> mobilisation response for the ECD truncated mutant, Rho-C-hCaS.**

**A)** Homology model of the full CaS structure. The ECD is adapted from the crystallography data of CaS (Geng et al., 2016, PDB: 5K5S). TMD and ICD are adapted from the crystallography data of mGluR5 (Doré et al., 2014, PDB:4009). The portion of the CaS that is Rho-C-hCaS is shown in orange.

**B)** Fura-2-loaded HEK cells transiently transfected with Rho-C-hCaS were stimulated with increasing Ca<sup>2+</sup><sub>o</sub> concentrations and then assayed for their Ca<sup>2+</sup><sub>i</sub> content (i). N=8 coverslips from three independent



transfections. The response of CaS<sup>WT</sup>-expressing cells to the same treatment is shown for comparison in panel ii. C) Rho-C-hCaS-transfected HEK cells were exposed to 3 mM Ca<sup>2+</sup><sub>o</sub> then cotreated with the PKC inhibitor GF109203X (250 nM; GFX). The response to GFX (area-under-the-curve) was normalised to the initial 3 mM Ca<sup>2+</sup><sub>o</sub> response. \*P<0.05 by paired t-test; n = 5 coverslips from two independent transfections.
